# Supplementary material for: Importance of multigene panel test in patients with consanguineous marriage and family history of breast cancer
Source: PubMed Central journal article supplement — Oncol Lett. 2022 Feb 9;23(4):118. doi: 10.3892/ol.2022.13238 (PMC8855161; doi:10.3892/ol.2022.13238), 2022-02-09
Supplement: Supplementary_Data.pdf [file Supplementary_Data.pdf]

Figure S1. Variant distribution among patients.

| Variant                                                 | Clinical Significance    | Personal History of Cancer | Family History of Cancer        | Consanguineous Marriage Status | File name Forward (F)                         | File name Reverse (R)                         | Patient |
|---------------------------------------------------------|--------------------------|----------------------------|---------------------------------|--------------------------------|-----------------------------------------------|-----------------------------------------------|---------|
| NM_007194(CHEK2):c.1427C>T, p.(Thr476Met)               | Likely pathogenic        | Breast                     | Breast, colon                   | Yes                            | GA3130_3150_CHEK2X13_F_2017-06-14_003.ab1     | GA3130_3150_CHEK2X13_R_2017-06-14_004.ab1     | P1      |
| NM_007194(CHEK2):c.1427C>T, p.(Thr476Met)               | Likely pathogenic        | Breast                     | Breast, colorectal, kidney      | Yes                            | GA3130_8452_CHEK2X13_F_2017-12-18_001.ab1     | GA3130_8452_CHEK2X13_R_2017-12-18_002.ab1     | P2      |
| NM_001128425(MUTYH):c.1171C>T, p.(Gln391*)              | Pathogenic (monoallelic) | Breast                     | Breast                          | Yes                            | GA3130_2823_MYHX11-12_F_2018-05-15_003.ab1    | GA3130_2823_MYHX11-12_R_2018-05-15_004.ab1    | P3      |
| NM_007294(BRCA1):c.4035delA, p.(Glu1346Lysfs*20)        | Pathogenic               | Breast                     | Breast, lung                    | Yes                            | 4591_1X11.9_F.ab1                             | 4591_1X11.9_R.ab1                             | P4      |
| NM_000059(BRCA2):c.9682delA, p.(Ser3228Valfs*21)        | Pathogenic               | Breast                     | Breast, ovarian                 | No                             | GA3130_2269_2X27.1_F_2017-05-19_003.ab1       | GA3130_2269_2X27.1_R_2017-05-19_004.ab1       | P5      |
| NM_000059(BRCA2):c.8087T>A, p.(Leu2696*)                | Pathogenic               | Breast                     | Breast, prostate, lung, gastric | No                             | GA3130_4517_BR2X18_F_2017-07-21_003.ab1       | GA3130_4517_BR2X18_R_2017-07-21_004.ab1       | P6      |
| NM_024675(PALB2):c.3271C>T, p.(Gln1091*)                | Pathogenic               | Breast                     | Breast                          | No                             | GA3130_7264_NEW_PALB2X12_F_2017-11-10_003.ab1 | GA3130_7264_NEW_PALB2X12_R_2017-11-10_004.ab1 | P7      |
| NM_000059(BRCA2):c.5557dupT, p.(Cys1853Leufs*5)         | Pathogenic               | Breast                     | Breast                          | No                             | GA3130_9697_2X11K_F_2018-01-15_003.ab1        | GA3130_9697_2X11K_R_2018-01-15_004.ab1        | P8      |
| NM_007294(BRCA1):c.5266dupC, p.(Gln1756Profs*74)        | Pathogenic               | Breast                     | Breast, gastric, skin, lung     | No                             | GA3130_0784_1X20_F_2018-03-06_001.ab1         | GA3130_0784_1X20_R_2018-03-06_002.ab1         | P9      |
| NM_058216(RAD51C):c.904+5G>T                            | Likely pathogenic        | Breast, Ovarian            | Breast, ovarian, prostate       | No                             | GA3130_1175_RAD51CX6_F_2018-03-22_003.ab1     | GA3130_1175_RAD51CX6_R_2018-03-22_004.ab1     | P10     |
| NM_000051(ATM):c.6527delT, p.(Leu2176Cysfs*59)          | Pathogenic               | Breast                     | Breast, lung, uterine           | No                             | GA3130_1765_ATMX45_F_2018-04-24_003.ab1       | GA3130_1765_ATMX45_R_2018-04-24_004.ab1       | P11     |
| NM_007294(BRCA1):c.3700_3704delGTAA, p.(Val1234Glnfs*8) | Pathogenic               | Breast                     | Breast, skin, melanoma, uterine | No                             | GA3130_2091_1X11.8_F_2018-04-23_003.ab1       | GA3130_2091_1X11.8_R_2018-04-23_004.ab1       | P12     |
| NM_005732(RAD50):c.326_329delCAGA, p.(Thr109Asnfs*20)   | Pathogenic               |                            |                                 |                                | GA3130_2091_RAD50X3_F_2018-04-23_001.ab1      | GA3130_2091_RAD50X3_R_2018-04-23_002.ab1      |         |
| NM_002485(NBN):c.657_661delACAAA, p.(Lys219Asnfs*16)    | Pathogenic               | Breast                     | lymphoma                        | No                             | 4618_NBNX6_F.ab1                              | 4618_NBNX6_R.ab1                              | P13     |
| NM_007194(CHEK2):c.1427C>T, p.(Thr476Met)               | Likely pathogenic        | Breast                     | None                            | No                             | GA3130_2397_CHEK2X13_F_2018-04-26_003.ab1     | GA3130_2397_CHEK2X13_R_2018-04-26_004.ab1     | P14     |
| NM_001128425(MUTYH):c.884C>T, p.(Pro295Leu)             | Pathogenic (monoallelic) | None                       | Pancreatic                      | NA                             | GA3130_8355_MUTYHX10_F_2017-12-04_003.ab1     | GA3130_8355_MUTYHX10_R_2017-12-04_004.ab1     | P15     |
| NM_000059(BRCA2):c.4936_4939delGAAA, p.Glu1646Glnfs*23  | Pathogenic               | None                       | Breast, ovarian                 | NA                             | GA3130_8940_2X11J_F_2017-12-13_003.ab1        | GA3130_8940_2X11J_R_2017-12-13_004.ab1        | P16     |
| NM_000179(MSH6):c.2764C>T, p.(Arg922*)                  | Pathogenic               | None                       | Breast, intestine               | NA                             | GA3130_2683_6X4.5_F_2018-05-09_003.ab1        | GA3130_2683_6X4.6_R_2018-05-09_004.ab1        | P17     |
| NM_007194(CHEK2):c.793-1G>A                             | Pathogenic               | None                       | Breast, ovarian, lung           | NA                             | 5226_CHEK2X7_F.ab1                            | 5226_CHEK2X7_R.ab1                            | P18     |

Figure S2. Sanger Sequencing analysis of genomic DNA from probands P1 and 2 carrying the variant CHEK2:c.1427C>T, p.(Thr476Met), P3 carrying the variant MUTYH:c.1171C>T, p.(Gln391\*) and P4 carrying the variant BRCA1:c.4035delA, p.(Glu1346Lysfs\*20).

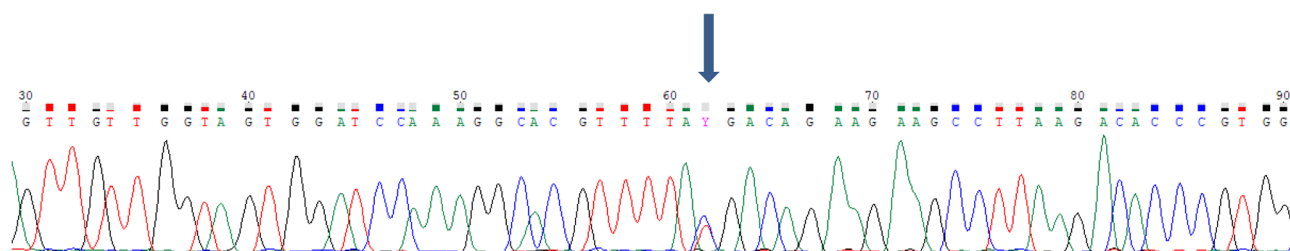

P1. CHEK2:c.1427C>T, p.(Thr476Met)

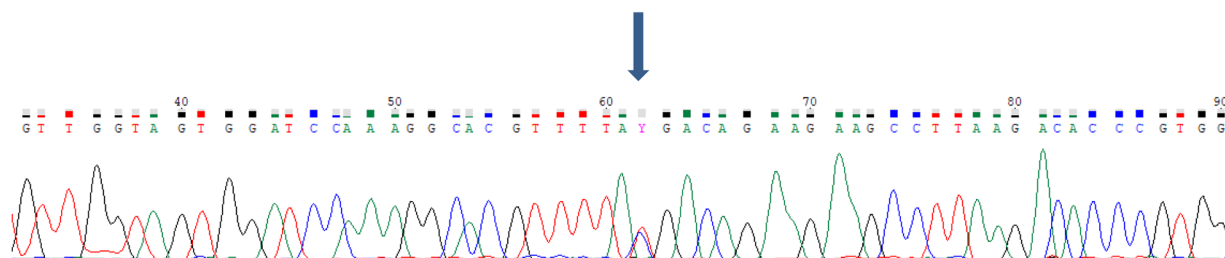

P2. CHEK2: c.1427C>T, p.(Thr476Met)

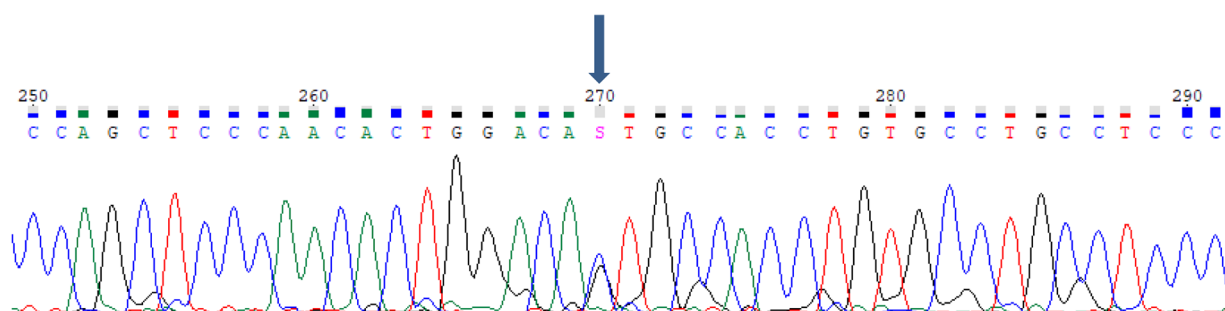

P3. MUTYH:c.1171C>T, p.(Gln391\*)

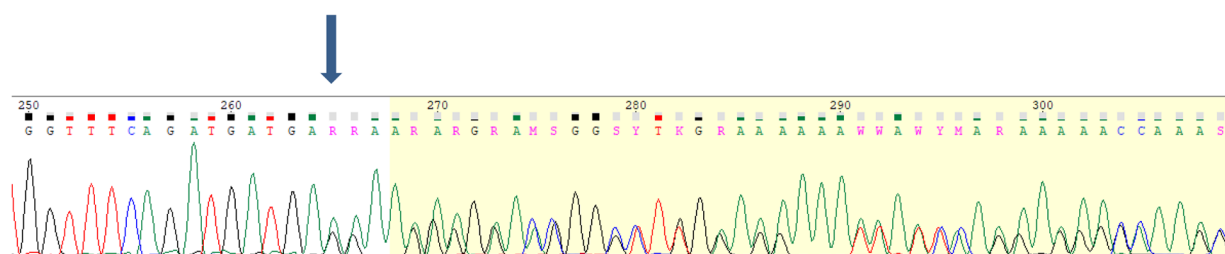

P4. BRCA1:c.4035delA, p.(Glu1346Lysfs\*20)

Figure S3. Sanger Sequencing analysis of genomic DNA from proband P5 carrying the variant BRCA2:c.9682delA, p.(Ser3228Valfs\*21), P6 carrying the variant BRCA2:c.8087T>A, p.(Leu2696\*), P7 carrying the variant PALB2:c.3271C>T, p.(Gln1091\*) and P8 carrying the variant BRCA2:c.5557dupT, p.(Cys1853Leufs\*5).

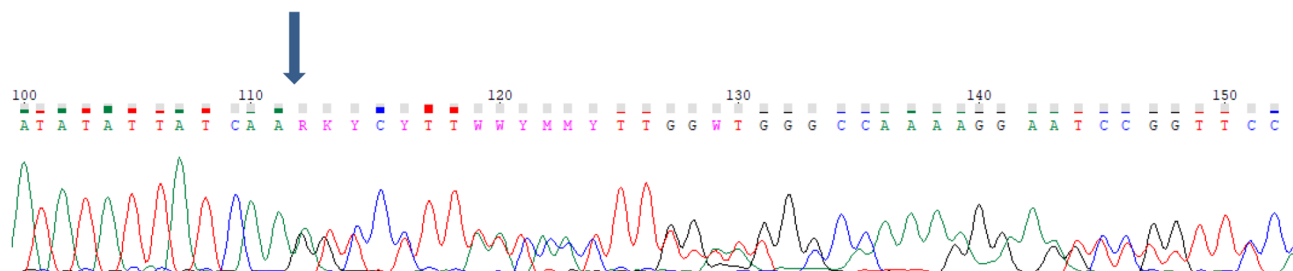

P5. BRCA2:c.9682delA, p.(Ser3228Valfs\*21)

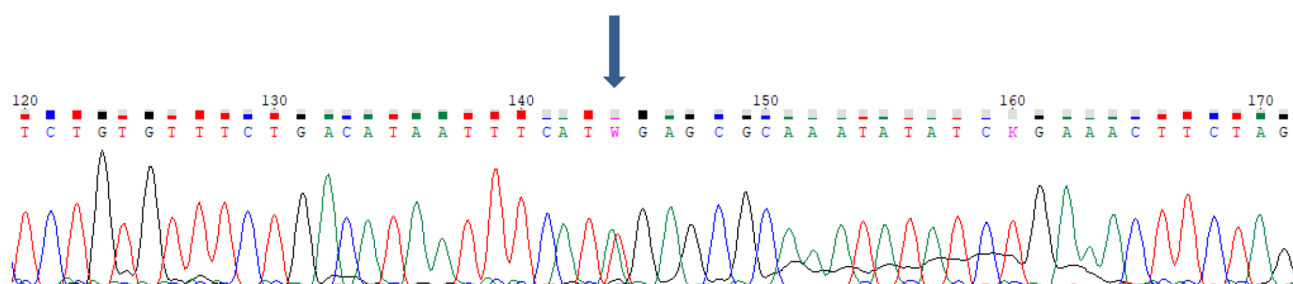

P6. BRCA2:c.8087T>A, p.(Leu2696\*)

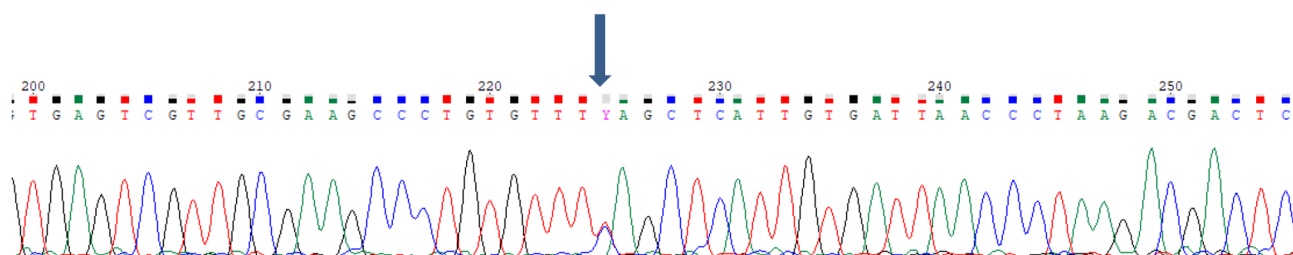

P7. PALB2:c.3271C>T, p.(Gln1091\*)

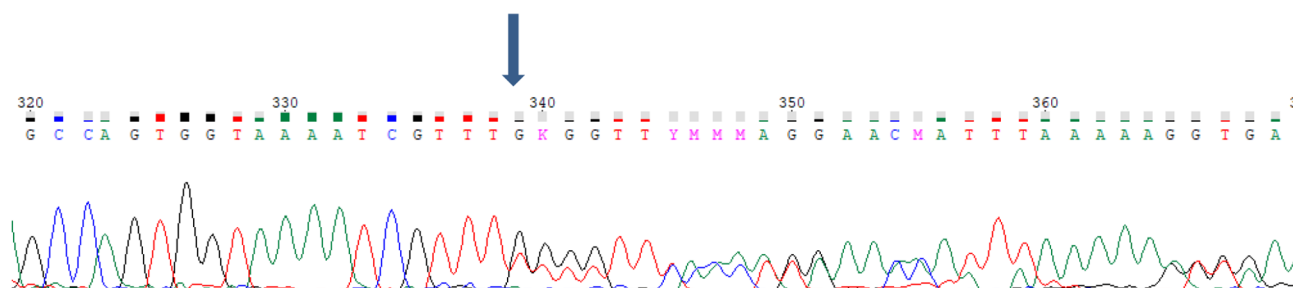

P8. BRCA2:c.5557dupT, p.(Cys1853Leufs\*5)

Figure S4. Sanger Sequencing analysis of genomic DNA from proband P9 carrying the variant BRCA1:c.5266dupC, p.(Gln1756Profs\*74)], P10 carrying the variant RAD51C:c.904+5G>T (indicated by the arrow), P11 carrying the variant ATM:c.6527delT, p.(Leu2176Cysfs\*59) and P12 carrying the variant BRCA1:c.3700\_3704delGTAAA, p.(Val1234Glnfs\*8).

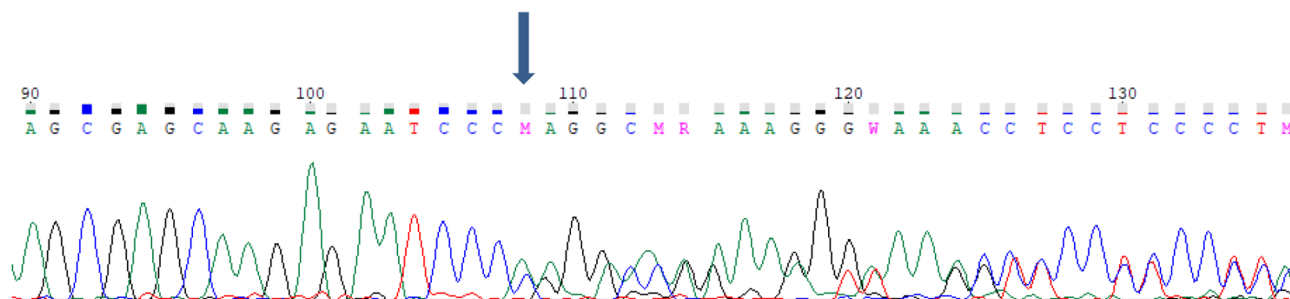

P9. BRCA1:c.5266dupC, p.(Gln1756Profs\*74)

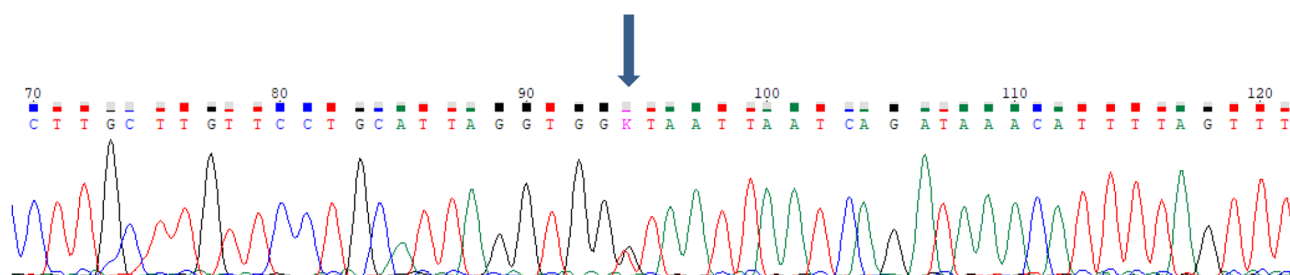

P10. RAD51C:c.904+5G>T

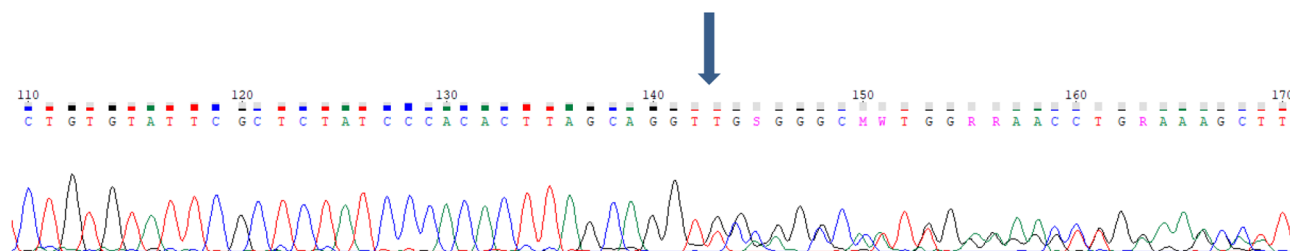

P11. ATM:c.6527delT, p.(Leu2176Cysfs\*59)

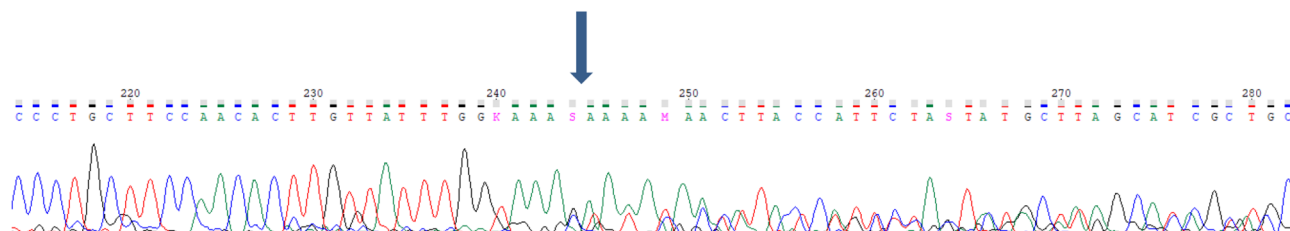

P12. BRCA1:c.3700\_3704delGTAAA, p.(Val1234Glnfs\*8)

Figure S5. Sanger Sequencing analysis of genomic DNA from the proband P12 carrying the variant RAD50:c.326\_329delCAGA, p.(Thr109Asnfs\*20), P13 carrying the variant NBN:c.657\_661delACAAA, p.(Lys219Asnfs\*16) and P14 carrying the variant CHEK2:c.1427C>T, p.(Thr476Met).

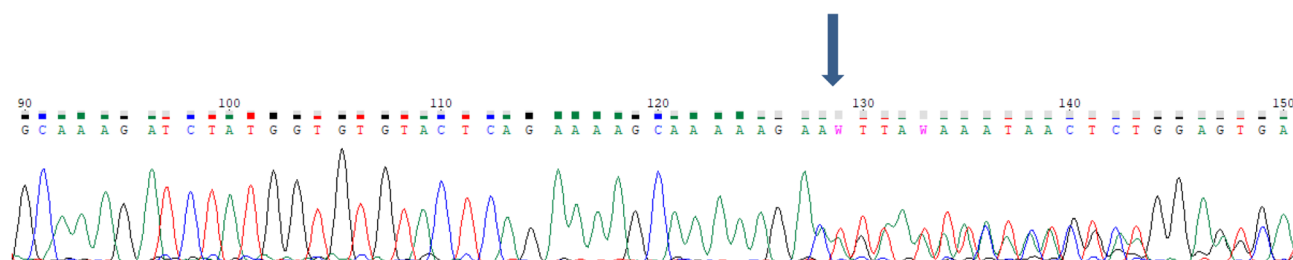

P12. RAD50:c.326\_329delCAGA, p.(Thr109Asnfs\*20)

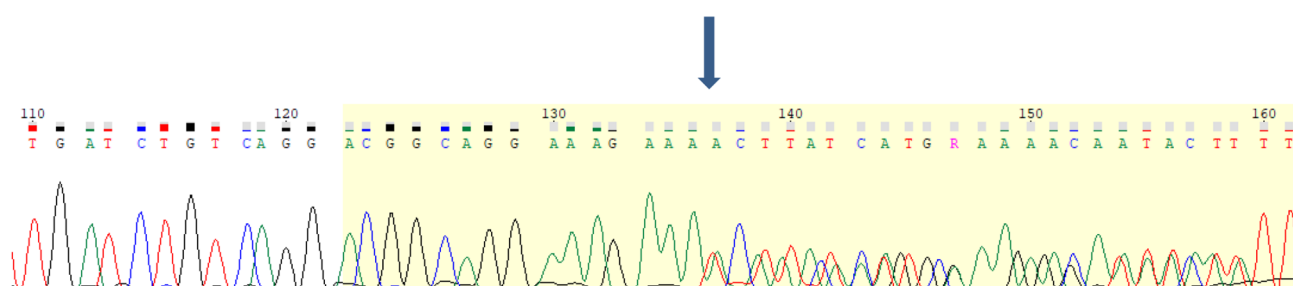

P13. NBN:c.657\_661delACAAA, p.(Lys219Asnfs\*16)

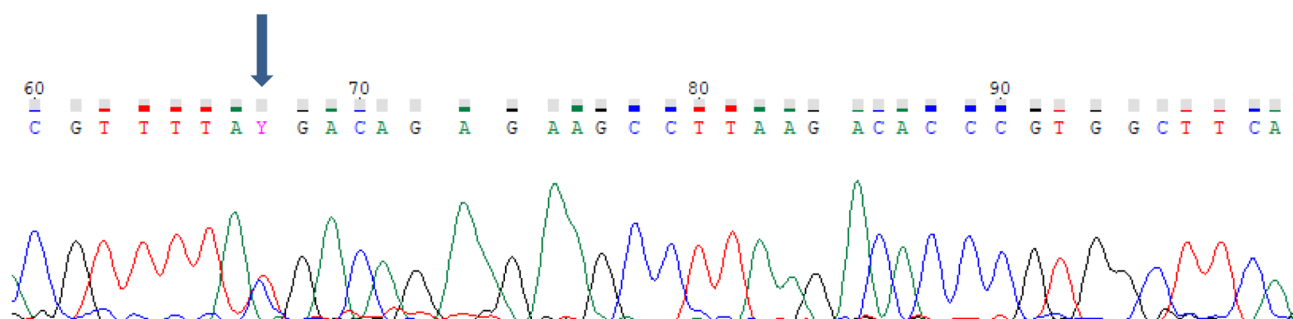

P14. CHEK2:c.1427C>T, p.(Thr476Met)

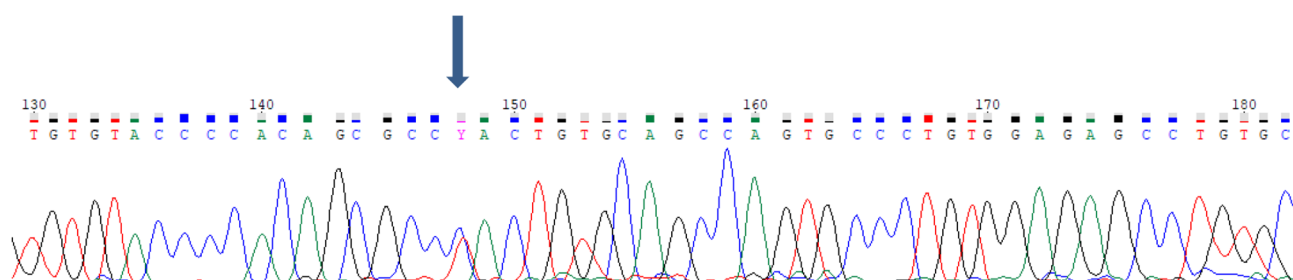

P15. MUTYH:c.884C>T, p.(Pro295Leu)

Figure S6. Sanger Sequencing analysis of genomic DNA from proband P15 carrying the variant MUTYH:c.884C>T, p.(Pro295Leu), P16 carrying the variant BRCA2:c.4936\_4939delGAAA, p.(Glu1646Glnfs\*23), P17 carrying the variant MSH6:c.2764C>T, p.(Arg922\*) and P18 carrying the variant CHEK2:c.793-1G>A.

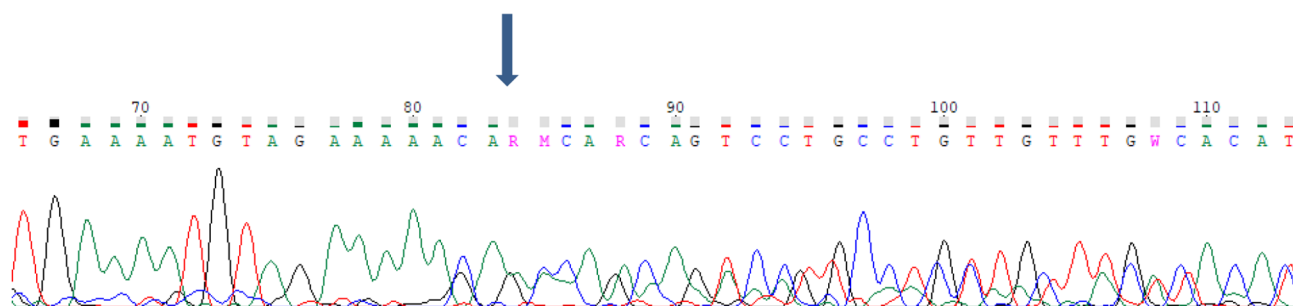

P16. BRCA2:c.4936\_4939delGAAA, p.Glu1646Glnfs\*23

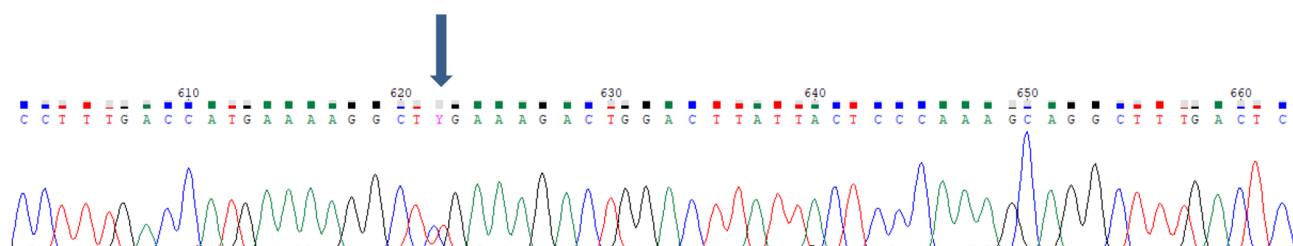

P17. MSH6:c.2764C>T, p.(Arg922\*)

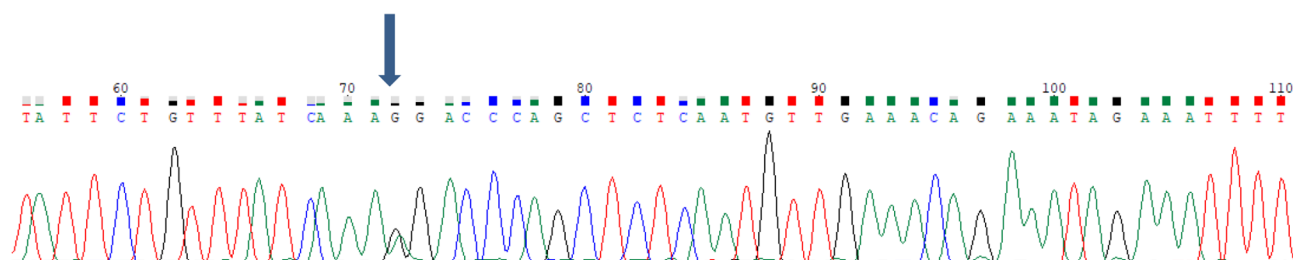

P18. CHEK2:c.793-1G>A
